# Supplementary material for: Cross-Species, Amplifiable EST-SSR Markers for Amentotaxus Species Obtained by Next-Generation Sequencing
Source: PubMed Central journal article supplement (PMC6273106; doi:10.3390/molecules21010067), 2016-01-07
Supplement: molecules-21-00067-s001.pdf [file molecules-21-00067-s001.pdf]

## Supplementary Materials: Cross-Species, Amplifiable EST-SSR Markers for *Amentotaxus* Species Obtained by Next-Generation Sequencing

Chiuan-Yu Li <sup>1,2,†</sup>, Tzen-Yuh Chiang <sup>3,†</sup>, Yu-Chung Chiang <sup>4,†</sup>, Hsin-Mei Hsu <sup>5</sup>, Xue-Jun Ge <sup>6</sup>, Chi-Chun Huang <sup>7</sup>, Chaur-Tzuhn Chen <sup>5</sup> and Kuo-Hsiang Hung <sup>2,\*</sup>

**Table S1.** Characteristics and functional annotations of 26 microsatellite primers were developed in *Amentotaxus formosana*.

| Locus  | Repeat Motif                                  | Primer Sequence(5'-3')                                                     | Allele Size (bps) | <i>Ta</i> |    |    |    | Cross Amplification | Accession Number | BLAST Top Hit Acc. No. | Description                                                                     | <i>e</i> -Value          |
|--------|-----------------------------------------------|----------------------------------------------------------------------------|-------------------|-----------|----|----|----|---------------------|------------------|------------------------|---------------------------------------------------------------------------------|--------------------------|
|        |                                               |                                                                            |                   | Ar        | Fo | Yu | Po |                     |                  |                        |                                                                                 |                          |
| Amen03 | (TGTTGC) <sub>4</sub><br>(GTT) <sub>4</sub>   | F: CATTCTGATTAGTTGCTTC<br>R:TAATGGTCAATCTGCTAGTC                           | 179–187           | 50        | 50 | 50 | 50 | 4/4                 | LN907616         | XP_002269363.2         | PREDICTED:<br><i>Vitis vinifera</i><br>hypothetical protein                     | 0                        |
| Amen04 | (GGAATG) <sub>6</sub>                         | F:GAGAACATTACAGGAAGTCA<br>R:AGGCATAATTGAACTGATT                            | 178–196           | 50        | 50 | 50 | 48 | 4/4                 | LN907617         | XP_001757450.1         | <i>Physcomitrella patens</i><br>subsp. <i>patens</i><br>predicted protein       | 4.77 × 10 <sup>-41</sup> |
| Amen07 | (ATTTT) <sub>3</sub><br>(ATTTTT) <sub>3</sub> | F:CATGGAGAGTCCTGATAGTA<br>R:CTCATACGGTCTGTAGAAAA<br>F:CATAGCACTTGAGATCACTT | 203–208           | 54        | 54 | 54 | 54 | 4/4                 | LN907618         | ACN26960.1             | <i>Zea mays</i> unknown<br>protein                                              | 2.92 × 10 <sup>-62</sup> |
| Amen10 | (CCA) <sub>4</sub><br>(CCT) <sub>12</sub>     | R:GCATTATAGAGTTTGACGA                                                      | 349–358           | 50        | 50 | 50 | 50 | 4/4                 | LN907619         | XP_002534324.1         | <i>Ricinus communis</i><br>putative<br>arginine/serine-rich<br>splicing factor, | 6.90 × 10 <sup>-15</sup> |
| Amen13 | (CTATCC) <sub>4</sub>                         | F:ATATCACTGGCAGTCTCTT<br>R:ATATCTATATGGTTGGCCTC                            | 254–290           | 50        | 50 | 50 | 50 | 4/4                 | LN907620         | CAN74005.1             | <i>Vitis vinifera</i><br>hypothetical protein<br>VITISV_006236                  | 4.54 × 10 <sup>-17</sup> |
| Amen15 | (CTG) <sub>3</sub><br>(GATTGG) <sub>4</sub>   | F:CTATTGTCAGAGAAATCGAA<br>R:GAAAGAGAAAGAGAAAGTGG                           | 264–279           | 53        | 53 | 53 | 53 | 4/4                 | LN907621         | XP_002265605.1         | <i>Vitis vinifera</i><br>PREDICTED: partial<br>hypothetical protein             | 1.22 × 10 <sup>-41</sup> |
| Amen18 | (AAGTGG) <sub>4</sub>                         | F:CATCTCGCTTCTATTCAT<br>R:AAAGCTTTATTGAACTTCG                              | 273–279           | 48        | 48 | 48 | 48 | 4/4                 | LN907622         | None                   | None                                                                            | None                     |
| Amen19 | (TGATGG) <sub>4</sub>                         | F:TAGGACAAAGAAGATAGCAG<br>R:CATCAACACCATCACTGT                             | 245–257           | 50        | 50 | 50 | 50 | 4/4                 | LN907623         | XP_002285304.1         | <i>Vitis vinifera</i><br>PREDICTED:<br>hypothetical protein                     | 1.45 × 10 <sup>-56</sup> |

Table S1. Cont.

| Locus  | Repeat Motif                                                               | Primer Sequence(5'–3')                            | Allele Size (bps) | <i>Ta</i> |    |    |    | Cross Amplification | Accession Number | BLAST Top Hit Acc. No. | Description                                                                          | <i>e</i> -Value           |
|--------|----------------------------------------------------------------------------|---------------------------------------------------|-------------------|-----------|----|----|----|---------------------|------------------|------------------------|--------------------------------------------------------------------------------------|---------------------------|
|        |                                                                            |                                                   |                   | Ar        | Fo | Yu | Po |                     |                  |                        |                                                                                      |                           |
| Amen20 | (CGGGAT) <sub>4</sub><br>N(GAGACG) <sub>3</sub> N<br>(GGAAGG) <sub>4</sub> | F:AAATCCTAGAAACGGTATTT<br>R:TTGTCTCAGCAGTTTCTTAT  | 279–300           | 50        | 50 | 50 | 50 | 4/4                 | LN907624         | None                   | None                                                                                 | None                      |
| Amen24 | (TCCTGC) <sub>6</sub>                                                      | F:CTCTTTATAACAGCCTCCTC<br>R:GAAGGCTTCTATTCTCTGT   | 206               | 51        | 51 | 51 | 51 | 4/4                 | LN907625         | XP_002525143.1         | <i>Ricinus communis</i><br>conserved hypothetical<br>protein                         | 3.49 × 10 <sup>-19</sup>  |
| Amen25 | (CCT) <sub>7</sub>                                                         | F:GAATCTACTCAATGTATGCG<br>R:GAGTAGAGACGTTCCAGTG   | 236               | 49        | 49 | 49 | 49 | 4/4                 | LN907626         | XP_002518826.1         | <i>Ricinus communis</i><br>conserved hypothetical<br>protein                         | 0                         |
| Amen26 | (AGGAAG) <sub>6</sub>                                                      | F:TATCTAGAGTGCTGTGTTGG<br>R:TTGAATTAGCATTAAATAGGG | 239–251           | 52        | 52 | 52 | 52 | 4/4                 | LN907627         | ABK24854.1             | <i>Picea sitchensis</i><br>unknown protein                                           | 1.07 × 10 <sup>-96</sup>  |
| Amen27 | (AGGATT) <sub>4</sub>                                                      | F:TGTATGGATTAAATAGGGA<br>R:AATCCTAATCCTAACCCCTAA  | 164–172           | 50        | 50 | 50 | 50 | 4/4                 | LN907628         | XP_002973804.1         | <i>Selaginella moellendorffii</i><br>hypothetical protein<br>SELMODRAFT_100054       | 2.10 × 10 <sup>-146</sup> |
| Amen30 | (CTGCC) <sub>4</sub>                                                       | F:GCATAGGTGTAGCTATGAAC<br>R:ATACTTGTGCAGTTTGATTT  | 402–414           | 50        | 50 | 50 | 50 | 4/4                 | LN907629         | XP_002300693.1         | <i>Populus trichocarpa</i><br>predicted protein                                      | 1.62 × 10 <sup>-58</sup>  |
| Amen35 | (GAT) <sub>10</sub>                                                        | F:CATTGGGCAAATTCAGTGTC<br>R:GCCTCCCACCCATTAGTAGA  | 237–252           | 50        | 50 | 50 | 50 | 4/4                 | LN907630         | XP_002268183.1         | <i>Vitis vinifera</i><br>PREDICTED:<br>hypothetical protein                          | 0                         |
| Amen38 | (CCA) <sub>9</sub>                                                         | F:AAGAAATCTGGGGCACTGGA<br>R:TGCACATCTTCTTCGTCACA  | 119–137           | 50        | 50 | 50 | 50 | 4/4                 | LN907631         | ADE77044.1             | <i>Picea sitchensis</i><br>unknown protein                                           | 0                         |
| Amen40 | (CA) <sub>12</sub>                                                         | F:ACCCAGCTCAATACCAAAGC<br>R:GCGAAATGTTGGTGACAGAC  | 350–380           | 51        | 51 | 51 | 51 | 4/4                 | LN907632         | None                   | None                                                                                 | None                      |
| Amen41 | (AGAA) <sub>6</sub>                                                        | F:CATGCAAATTGAGGCCAGTA<br>R:ATAGGAGGAGAGGGCAAGGT  | 146–158           | 50        | 50 | 50 | 50 | 4/4                 | LN907633         | EEC84662.1             | <i>Oryza sativa</i> Indica<br>Group hypothetical<br>protein OsI_31560                | 5.08 × 10 <sup>-10</sup>  |
| Amen42 | (AGA) <sub>9</sub>                                                         | F:TGATGAGGAAGATGGGATGA<br>R:CTTGGAGCATTCTCTGATGC  | 206               | 50        | 50 | 50 | 50 | 4/4                 | LN907634         | XP_002523095.1         | <i>Ricinus communis</i><br>putative U3 small<br>nucleolar RNA-<br>associated protein | 1.25 × 10 <sup>-22</sup>  |

Table S1. Cont.

| Locus  | Repeat Motif          | Primer Sequence(5'-3')                           | Allele Size<br>(bps) | <i>Ta</i> |    |    |    | Cross<br>Amplification | Accession<br>Number | BLAST Top Hit<br>Acc. No. | Description                                                                    | <i>e</i> -Value           |
|--------|-----------------------|--------------------------------------------------|----------------------|-----------|----|----|----|------------------------|---------------------|---------------------------|--------------------------------------------------------------------------------|---------------------------|
|        |                       |                                                  |                      | Ar        | Fo | Yu | Po |                        |                     |                           |                                                                                |                           |
| Amen43 | (TGG) <sub>10</sub>   | F:AAGGTCTGTTGAAGTTTCGC<br>R:AAGGGAGCGATTATTGGTTG | 180–210              | 50        | 50 | 50 | 50 | 4/4                    | LN907635            | XP_002969636.1            | <i>Selaginella moellendorffii</i><br>hypothetical protein<br>SELMODRAFT_231344 | 5.07 × 10 <sup>-136</sup> |
| Amen44 | (GGAGA) <sub>4</sub>  | F:GAGCACGTGGGGTTCTATG<br>R:GAGCGAGGGCAATAAAGAG   | 95–100               | 50        | 50 | 50 | 50 | 4/4                    | LN907636            | ABK23596.1                | <i>Picea sitchensis</i><br>unknown protein                                     | 1.07 × 10 <sup>-68</sup>  |
| Amen46 | (AGTTG) <sub>6</sub>  | F:GTGTATAGGCCGACCTTTT<br>R:TGCACCTGCAACAACAAC    | 169–174              | 50        | 50 | 50 | 50 | 4/4                    | LN907637            | CAN59753.1                | <i>Vitis vinifera</i><br>hypothetical protein<br>VITISV_036639                 | 6.37 × 10 <sup>-178</sup> |
| Amen47 | (CTCC) <sub>8</sub>   | F:GGAAACTGGAATAGTCGGGA<br>R:ATTTGCTGCAACAGAGCAAG | 148–203              | 50        | 50 | 50 | 50 | 4/4                    | LN907638            | ABK23165.1                | <i>Picea sitchensis</i><br>unknown protein                                     | 8.39 × 10 <sup>-54</sup>  |
| Amen48 | (CT) <sub>15</sub>    | F:ATTTTATGGGCAGTCAAGGC<br>R:TAGAGGGAGAAGGAGACGGA | 237–267              | 52        | 52 | 52 | 52 | 4/4                    | LN907639            | None                      | None                                                                           | None                      |
| Amen50 | (ATAGA) <sub>10</sub> | F:CATAGACTACGCTCACCCCA<br>R:CTCCCCTACCTACCCTACCC | 220–260              | 53        | 53 | 53 | 53 | 4/4                    | LN907640            | None                      | None                                                                           | None                      |
| Amen52 | (AATAG) <sub>8</sub>  | F:TAGGGCATACTATCTGCCA<br>R:GCCTCCAGGCCATAGATA    | 288–318              | 50        | 50 | 50 | 50 | 4/4                    | LN907641            | None                      | None                                                                           | None                      |

The forward (F) and reverse (R) sequences, repeat motif, allele size (bps), annealing temperature when run individually (*Ta*), cross amplification, the GenBank accession number and Blast analysis are indicated. Abbreviations Ar, Fo, Yu, and Po indicate *A. argotaenia*, *A. formosana*, *A. yunnanensis*, and *A. poilanei*, respectively.
